# Supplementary material for: Selective predisposition to bacterial infections in IRAK-4–deficient children: IRAK-4–dependent TLRs are otherwise redundant in protective immunity
Source: PubMed Central journal article supplement — J Exp Med. 2007 Oct 1;204(10):2407–22. doi: 10.1084/jem.20070628 (PMC2118442; doi:10.1084/jem.20070628), 2007-10-01
Supplement: jexpmed_jem.20070628_3.pdf [file jexpmed_jem.20070628_3.pdf]

**Table S1.** Blood leukocyte subsets in IRAK-4-deficient patients

| Patients<br>(age years)                 | P11<br>1 | P23<br>1 | P19<br>2 | Normal<br>values<br>1-2 | P1<br>5 | P8<br>5 | P15<br>5 | P28<br>5 | P3<br>7 | Normal<br>values<br>5-7 | P2<br>14 | P17<br>27 | P18<br>27 | P7<br>32 | Normal<br>values<br>>14 |
|-----------------------------------------|----------|----------|----------|-------------------------|---------|---------|----------|----------|---------|-------------------------|----------|-----------|-----------|----------|-------------------------|
| Lymphocytes<br>(10 <sup>9</sup> per µl) | 5        | 6.2      |          | (3.6-9)                 | 3.3     | 1.9     | 4.8      | 3.2      | 5       | (2.3-5.7)               | 2.6      | 1.3       | 1.3       |          | (1.4-3.3)               |
| T cells (%)                             |          |          |          |                         |         |         |          |          |         |                         |          |           |           |          |                         |
| CD3 <sup>+</sup>                        | 71       | 77       | 73       | (53-75)                 | 75      | 71      | 86       | 57       | 68      | (56-76)                 | 75       | 72        | 76        |          | (56-84)                 |
| CD4 <sup>+</sup>                        | 48       | 48       | 29       | (32-51)                 | 55      | 45      | 63       | 35       | 52      | (28-47)                 | 54       | 56        | 46        |          | (31-52)                 |
| CD8 <sup>+</sup>                        | 29       | 26       | 43       | (14-30)                 | 32      | 25      | 17       | 24       | 14      | (16-35)                 | 22       | 13        | 20        |          | (18-35)                 |
| CD4 <sup>+</sup> /CD45RA <sup>+</sup>   |          | 40       |          | (64-93)                 |         |         |          |          |         |                         | 58       |           |           |          |                         |
| CD4 <sup>+</sup> /CD45RO <sup>+</sup>   |          |          |          |                         |         |         |          |          |         |                         | 45       |           |           |          |                         |
| CD8 <sup>+</sup> /CD45RA <sup>+</sup>   |          |          |          |                         |         |         |          |          |         |                         | 86       |           |           |          |                         |
| NK cells (%)                            |          |          |          |                         |         |         |          |          |         |                         |          |           |           |          |                         |
| CD56 <sup>+</sup> /CD16 <sup>-</sup>    |          | 5        |          | (4-31)                  |         |         | 3.4      | 3        | 2       | (4-31)                  | 10       |           |           |          | (4-31)                  |
| CD56 <sup>+</sup> /CD3 <sup>-</sup>     |          |          |          |                         |         | 4       | 8.3      |          |         | (4-22)                  | 12       | 11        | 8         |          | (4-22)                  |
| CD56 <i>bright</i>                      |          |          |          |                         |         |         | 3.4      |          |         | (3-13)                  |          |           |           |          |                         |
| CD56 <i>dim</i>                         |          |          |          |                         |         |         | 96.6     |          |         | (87-97)                 |          |           |           |          |                         |
| CD56 <sup>+</sup> /CD3 <sup>+</sup>     |          |          |          |                         |         |         | 0.2      |          |         | (2-8)                   |          |           |           |          |                         |
| B cells (%)                             |          |          |          |                         |         |         |          |          |         |                         |          |           |           |          |                         |
| CD19 <sup>+</sup>                       | 7        | 10       | 17       | (6-35)                  | 23      | 20      | 6        | 38       | 28      | (6-35)                  | 16       | 15        | 12        |          | (6-35)                  |
| CD19 <sup>+</sup> /CD27 <sup>+</sup>    |          |          |          |                         |         |         |          |          |         |                         | 17       |           |           |          | (10-25)                 |
| Monocytes (%)                           |          |          |          |                         |         |         |          |          |         |                         |          |           |           |          |                         |
| CD14 <sup>+</sup> /CD16 <sup>-</sup>    |          |          |          |                         |         |         | 6.8      |          |         | (6.2-15.4)              | 4.6      |           |           | 12.4     | (6.2-15.4)              |
| CD14 <sup>+</sup> /CD16 <sup>+</sup>    |          |          |          |                         |         |         | 0.4      |          |         | (0.15-1.4)              | 0.33     |           |           | 0.1      | (0.15-1.4)              |
| CD16 high                               |          |          |          |                         |         |         | 0.7      |          |         | (1.05-2.6)              | 0.83     |           |           | 1.72     | (1.05-2.6)              |
| BDCA-1 <sup>+</sup>                     |          |          |          |                         |         |         | 0.11     |          |         | (0.09-0.9)              | 0.48     |           |           | 0.12     | (0.09-0.9)              |
| BDCA-2 <sup>+</sup>                     |          |          |          |                         |         |         | 0.31     |          |         | (0.15-0.6)              | 0.8      |           |           | 0.35     | (0.15-0.6)              |

Total lymphocyte counts; percentages of T cells, NK cells, B cells, and monocytes; and the age-specific normal values are shown.

**Table S2.** T cell proliferation, Ig levels, and humoral responses to recall antigens and to glycans in IRAK-4-deficient patients

| Patients (age)                               | P6 (2 mo) | P5 (1 y) | P11 (1 y) | P23 (1 y) | Normal values (1–2 y) | P1 (5 y) | P8 (5 y) | P15 (5 y) | P13 (7 y) | P3 (7 y) | Normal values (5–7 y) | P2 (14 y) | P24 (16 y) | P17 (27 y) | P18 (27 y) | P7 (32 y) | Normal values >14 y |
|----------------------------------------------|-----------|----------|-----------|-----------|-----------------------|----------|----------|-----------|-----------|----------|-----------------------|-----------|------------|------------|------------|-----------|---------------------|
| <b>Proliferation</b><br>( $\times 10^3$ cpm) |           |          |           |           |                       |          |          |           |           |          |                       |           |            |            |            |           |                     |
| CD3                                          |           |          |           | 59        | (>30)                 |          |          |           |           |          | (>30)                 | 80        |            | 26         | 48         |           | (>30)               |
| PHA                                          |           |          |           |           | (>50)                 |          |          | 142       |           |          | (>50)                 | 238       |            | 112        | 135        |           | (>50)               |
| PPD                                          |           |          |           |           | (>10)                 |          |          | 7         |           |          | (>10)                 | 94        |            | 1.7        | 10         |           | (>10)               |
| Candidine                                    |           |          |           |           | (>10)                 |          |          | 7         |           |          | (>10)                 | 16        |            | 7          | 19         |           | (>10)               |
| Tetanus                                      |           |          |           |           | (>10)                 |          |          |           |           |          | (>10)                 | 123       |            | 0.5        | 1          |           | (>10)               |
| <i>S. aureus</i>                             |           |          |           | 35        | (>10)                 |          |          |           |           |          | (>10)                 |           |            |            |            |           | (>10)               |
| <b>Serum Ig (mg/ml)</b>                      |           |          |           |           |                       |          |          |           |           |          |                       |           |            |            |            |           |                     |
| IgG                                          | 5.7       | 5.4      | 17        | 8.9       | (5–10)                | 11.7     | 13.9     | 10.7      |           |          | (7–12)                | 10.9      |            | 15         | 13         | 16.7      | (9–14.8)            |
| IgG1                                         |           |          |           |           |                       |          | 8.4      | 5.88      |           |          | (>4)                  |           |            |            |            |           |                     |
| IgG2                                         |           |          |           |           |                       |          | 3.12     | 1.18      |           |          | (>0.4)                |           |            |            |            |           |                     |
| IgG3                                         |           |          |           |           |                       |          | 0.34     | 0.45      |           |          | (>0.16)               |           |            |            |            |           |                     |
| IgG4                                         |           |          |           |           |                       |          | 3.54     | 0.5       |           |          | –                     |           |            |            |            |           |                     |
| IgA                                          | 0.6       | 0.2      | 0.9       | 0.47      | (0.2–0.8)             | 0.63     | 3.35     | 1.31      |           |          | (0.7–1.6)             | 0.22      |            | 0.3        | 0.6        | 1.1       | (1.1–2.6)           |
| IgM                                          | 0.6       | 1.1      | 2         | 1.11      | (0.5–1.1)             | 0.72     | 0.74     | 0.5       |           |          | (0.5–1.2)             | 0.82      |            | 1.3        | 1.5        | 1.9       | (0.88–1.8)          |
| IgE (kU/ml)                                  |           |          | 2,600     | 801       | (<40)                 | 17,400   | 187      | 352       | 792       |          | (<100)                | 11        | 36.6       | 255        | 96.5       | 136       | (<114)              |
| <b>Specific antibodies</b>                   |           |          |           |           |                       |          |          |           |           |          |                       |           |            |            |            |           |                     |
| Antitetanus                                  |           |          | >0.1      | 0.12      | (>0.1)                |          | 0.59     | 0.06      |           | 1.81     | (>0.1)                | 0.47      |            | 0.34       | 0.45       | 0.06      | (>0.1 IU/ml)        |
| Poliovirus                                   |           |          |           |           | (>40)                 |          |          | >40       |           |          | (>40)                 | 40        |            |            |            |           | (>40 Ab)            |
| Diphtheria                                   |           |          |           | 0.26      | (>0.1)                | 2.04     | 0.1      | 0.002     |           | 0.88     | (>0.1)                |           |            |            |            | 0.18      | (>0.1 IU/ml)        |
| <i>S. pneumoniae</i>                         |           |          |           | <0.3      | (>0.3)                | 1.9      | <0.3     | >0.6      |           |          | (>0.3)                | <0.3      |            | <0.3       | <0.3       | >0.3      | (>0.3 $\mu$ g/ml)   |
| <i>H. influenzae</i>                         |           |          |           |           | pos.                  | pos.     | pos.     |           |           | pos.     | pos.                  | pos.      |            |            |            | pos.      | pos.                |
| Allohemagglutinin                            |           |          | 1/16      |           |                       | 1/128    | 1/2      | 1/8       | 1/8       |          | $\leq 1/16$           |           | 1/32       | 1/16       | 1/16       | 1/2       | $\leq 1/16$         |

Proliferative responses to OKT3 (CD3), to the mitogen PHA, and to different antigens (PPD, candidine, tetanus, and heat-killed *S. aureus*), serum Ig levels, and titers for specific antibodies and the age-specific normal values are shown. pos., positive.

**Table S3.** Serology of patients to common viruses

| Patients       | P1           | P2           | P3           | P7           | P8           | P13          | P15      |
|----------------|--------------|--------------|--------------|--------------|--------------|--------------|----------|
| Serology       |              |              |              |              |              |              |          |
| CMV            | negative     | negative     | negative     | negative     | positive     | IgG positive |          |
| EBV            | positive     | positive     | negative     | positive     | negative     | positive     |          |
| EA             | negative     | negative     |              |              |              |              |          |
| VCA            | IgG positive | IgG positive | negative     | IgG positive | negative     | IgG positive |          |
| EBNA           | negative     | IgG positive | negative     | IgG positive | negative     | IgG positive |          |
| HSV            | negative     | negative     | negative     | negative     | negative     | negative     |          |
| VZV            | IgG positive | IgG positive | negative     | IgG positive | negative     | IgG positive |          |
| HHV6           | IgG positive |          |
| Parvovirus B19 | IgG positive | negative     | negative     | IgG positive | negative     | negative     |          |
| Rubeola        | IgG positive | negative     |          |
| Mumps          | positive     | positive     | positive     | positive     | positive     | positive     | positive |
| coxsackie B1   | negative     | negative     | negative     | negative     | negative     | negative     | negative |
| coxsackie B2   | negative     | positive     | negative     | negative     | negative     | positive     | positive |
| coxsackie B3   | positive     | positive     | negative     | positive     | positive     | positive     | positive |
| coxsackie B4   | positive     | positive     | negative     | negative     | positive     | negative     | positive |
| coxsackie B6   | negative     | negative     | negative     | negative     | negative     | negative     | negative |
| RSV            | positive     | positive     | positive     | positive     | positive     | positive     |          |
| HMPV           | positive     | negative     | positive     | positive     | positive     | positive     |          |

EA, early antigen; EBNA, EBV nuclear antigen; HHV6, human herpes virus 6; HMPV, human metapneumovirus; RSV, respiratory syncytial virus; VCA, virus capsular antigen; VZV, varicella zoster virus.
